# Supplementary material for: The Amino Acid Composition of Quadruplex Binding Proteins Reveals a Shared Motif and Predicts New Potential Quadruplex Interactors
Source: MDPI journal article supplement (doi:10.3390/molecules23092341), 2018-09-13
Supplement: s1 [file s1]

**Supplementary material 5.** Short patterns and homo repeats of amino acid residues in analysed QBPs (according to HRaP database)

| <b>QBP</b> | <b>Patterns</b>                                         | <b>Homo repeats (3 AA and more)</b>         |
|------------|---------------------------------------------------------|---------------------------------------------|
| CNBP       | -                                                       | E3                                          |
| IGF-2      | -                                                       | -                                           |
| MAZ        | PPPPP, GGGGG, PPAPP, PAPPP, AAPPA                       | A3, A5, A13, A14, G3, G5, P3, P7            |
| HNRNPA1    | GGGGSGG, GGGGG                                          | G3, G4, G5, S3, S6                          |
| NUCL       | EDEREE, EEEEEEE, DDDDEDD, RGEFGF, EDDEDED, EEDDD, DSDEE | V3, A3, A5, G3, G4, E3, E10, D3, D4, D5, P3 |
| NPM        | EDEREE, DDDDEDD, EEEED, EEDDD                           | G3, E4, D3, D6                              |
| TLS/FUS    | GSHM, GGGGSGG, GGGGG, GGSGGGGSGGG, RGGGGSG              | G3, G4, G7, G10, S3, Q3,                    |
| POT1       | -                                                       | L3, D3                                      |
| BLM        | KKTSS                                                   | G3, T3, S3, S5, Q3, D4, D5, K3, P3          |
| FANCI      | -                                                       | C3, L3, N3                                  |
| DHX36      | GGGGSGG, GGGGG                                          | G3, G10, E3, R3, K3                         |
| VEGF       | -                                                       | L3, G3                                      |
| SP1        | QQQQQQQ                                                 | I3, A3, G3, G4, T5, S3, S4, Q4, K3          |
| BRCA1      | RRGKKK                                                  | L3, V3, A3, S3, E3, K4                      |
| TOPO       | PSPPP, EEEED, KKPKNK, KKEKK                             | I3, Q3, E3, E4, K3, K4, P3                  |
| PARP1      | KKSKK                                                   | K3, P3                                      |
| p53        | APAPA                                                   | V3, S3, E3, K3, P3                          |
| IFI16      | PPAPAG                                                  | F3, I4, V3, S3, K3                          |
| RECQ4      | EEEEG                                                   | I3, V3, A3, G3, G4, S3, E4, R3              |
| DPOE1      | EEEEEEE                                                 | L3, A3, S3, E3, E4, E5, R3, K3, P3          |
| POLH       | -                                                       | L3, G3, S3                                  |
| DSRAD      | RGRPRG, PPAPAG, GVPRG                                   | L3, V3                                      |
| NF2L2      | -                                                       | S3, R3, P3                                  |
| ERCC3      | -                                                       | Q3, E3, E6, K3                              |
| ERCC2      | -                                                       | I3, L3, V3                                  |
| TERF1      | EEEEEEE, EEEED                                          | A3, Q3, E8, K4                              |
| TINF2      | DSDEE                                                   | V3, A4, Q3, E3, R3                          |
| ACD        | -                                                       | L3, L4, S3, P3                              |
| SPAST      | APAPA, PAPPP                                            | L3, L4, K3, P3, P4                          |
| CAMP       | -                                                       | L4                                          |
| ROA2       | -                                                       | G3, G4                                      |
| RFA2       | -                                                       | S3, D3                                      |
| RFA1       | -                                                       | S3, E3                                      |
| NDKB       | -                                                       | -                                           |
| MYOD1      | -                                                       | L3, A3, A4, R3                              |
| MYF5       | -                                                       | T3, S3, R3                                  |
| MYF6       | -                                                       | M3, S3, R3                                  |
| MYOG       | -                                                       | G4, R3                                      |
| TERT       | PPAAP                                                   | L3, A3, S3, E3, R3, P3                      |
| TNR4       | -                                                       | L4, G3                                      |

|          |                                                          |                                                                             |
|----------|----------------------------------------------------------|-----------------------------------------------------------------------------|
| EGR1     | GGGGSGG, GGGGG, NSSSS, GGGGSGGGGS, GGHNSS                | A3, G9, S4, S6, Q3, P3                                                      |
| YBOX1    | PPAAP, AAPPA                                             | R3, R4                                                                      |
| TE2IP    | EEEEEEE                                                  | V3, G3, E3, E8, D3                                                          |
| NEIL1    | -                                                        | K3                                                                          |
| NEIL2    | -                                                        | G4, S3                                                                      |
| NEIL3    | -                                                        | V3, A3, T3                                                                  |
| TOPRS    | KKKKK                                                    | Y4, T3, S3, R3, K3, K6, P3                                                  |
| ATRX     | KKKKK, KKTSS, EEEEEEE, EEEED, KKGKS, KKSCK               | C3, L3, G3, S3, S4, S5, Q3, Q6, E3, E4, E6, E15, D3, D6, R3, K3, K4, K5, P3 |
| DNM3A    | RGRPRG                                                   | A3, S3, N3, E3, D3, R3, P4                                                  |
| DNM3B    | -                                                        | L3, S3, N3, D3, R3                                                          |
| DNMT1    | EDEREE                                                   | V3, A3, T3, S3, E3, D3, R3, K4, P3                                          |
| FMR1     | MGRGS                                                    | G3, G4, E3, R3, P3                                                          |
| ADA10    | CGYSD, SDGKDD                                            | L3, N3, R3, K3, P3                                                          |
| EFHD2    | -                                                        | A3, A6, G3, E3                                                              |
| SRSF1    | GGGGSGG, GGGGG                                           | V3, G3, G9                                                                  |
| U2AF2    | -                                                        | V3, R4, K4, P3                                                              |
| NOA1     | Not found in database                                    |                                                                             |
| HNRPF    | -                                                        | -                                                                           |
| EBNA1BP2 | Not found in database                                    |                                                                             |
| ROA3     | GGGGSGG, GGGGG, RPQLDS                                   | G3, G4, G5, G6, Q3, R6, P3                                                  |
| SFPQ     | GGGGSGG, PPPPP, GGGGG, QQQQQP, PPPPQ                     | A3, G3, G4, G5, G6, T3, S3, Q4, Q5, E3, R4, P3, P5                          |
| SF3B3    | -                                                        | F3, I3, A3, D3, R3, K3                                                      |
| ELAV1    | -                                                        | -                                                                           |
| ILF3     | GGGGSGG, GGGGG, KKKKK, SKKKK, RGRPRG, GGGSSG, GGGGSGGGGS | L3, G3, G5, G9, Q3, K3, K5, P4                                              |
| NONO     | PPPPP, QQQQQP                                            | Q3, Q6, E3, H3, R3, R4, P5                                                  |
| HNRPR    | RGRPRG                                                   | Y3, G3, Q3, E4, R3, K3, P3, P4                                              |
| TERF2    | -                                                        | G4                                                                          |
| HNRPL    | GGGGSGG, PPPPP, GGGGG                                    | V3, A3, G3, G6, G7, G9, S3, N3, R3, R4, P4, P8                              |
| SAFB1    | -                                                        | A3, S3, E3, D3, R3, P4                                                      |
| IF2B1    | -                                                        | V3, S3, Q3, P4                                                              |
| SAFB2    | GHMA                                                     | G3, E3, R3, P4                                                              |
| DHX15    | LDNGED, EEEEG                                            | L3, V3, Q4, E4, P4                                                          |
| ILF2     | RGRPRG                                                   | G3, S3, E4, E5                                                              |
| DHX30    | EDEREE, EEEEEEE, EEEED, REEEE                            | L3, V3, A3, A5, S3, E4, D3, R3, K4, P3                                      |
| HNRPK    | PPPPP                                                    | E3, P6                                                                      |
| DDX21    | -                                                        | A3, G3, E3, E4, K3                                                          |
| TADBP    | -                                                        | A3, G3                                                                      |

**Most frequent patterns:**

**GGGGG ... 10 (MAZ, HNRNPA1, TLS/FUS, DHX36, EGR1, SRSF1, ROA3, SFPQ, ILF3, HNRPL)**

**GGGGSGG ... 9 (HNRNPA1, TLS/FUS, DHX36, EGR1, SRSF1, ROA3, SFPQ, ILF3, HNRPL)**

**EEEEEEE ... 6 (NUCL, DPOE1, TERF1, TE2IP, ATRX, DHX30)**

**RGRPRG ... 5 (DSRAD, DNM3A, ILF3, HNRPR, ILF2)**
