# Supplementary material for: The Amino Acid Composition of Quadruplex Binding Proteins Reveals a Shared Motif and Predicts New Potential Quadruplex Interactors
Source: MDPI journal article supplement (doi:10.3390/molecules23092341), 2018-09-13
Supplement: s1 [file s1]

| 77 QBPs vs. 5 000 randomly selected human proteins |                  |          | 77 QBPs vs. 15 224 human nucleic acid binding proteins including isoforms |                  |          | 77 QBPs vs. 2 565 Golgi apparatus proteins including isoforms |                  |          |
|----------------------------------------------------|------------------|----------|---------------------------------------------------------------------------|------------------|----------|---------------------------------------------------------------|------------------|----------|
| aa residue                                         | change           | p-value  | aa residue                                                                | Change           | p-value  | aa residue                                                    | change           | p-value  |
| A                                                  | Depleted.        | 0.000027 | A                                                                         | Not significant. | 0.047012 | A                                                             | Depleted.        | 0.000000 |
| C                                                  | Depleted.        | 0.000000 | C                                                                         | Depleted.        | 0.000000 | C                                                             | Not significant. | 0.020112 |
| D                                                  | Enriched.        | 0.000000 | D                                                                         | Enriched.        | 0.000000 | D                                                             | Enriched.        | 0.000000 |
| E                                                  | Enriched.        | 0.000000 | E                                                                         | Not significant. | 0.275823 | E                                                             | Enriched.        | 0.000000 |
| F                                                  | Not significant. | 0.009811 | F                                                                         | Not significant. | 0.059237 | F                                                             | Depleted.        | 0.000001 |
| G                                                  | Enriched.        | 0.000000 | G                                                                         | Enriched.        | 0.000000 | G                                                             | Enriched.        | 0.000000 |
| H                                                  | Depleted.        | 0.000010 | H                                                                         | Depleted.        | 0.000000 | H                                                             | Not significant. | 0.006228 |
| I                                                  | Depleted.        | 0.000044 | I                                                                         | Not significant. | 0.335044 | I                                                             | Depleted.        | 0.000000 |
| K                                                  | Enriched.        | 0.000000 | K                                                                         | Not significant. | 0.015759 | K                                                             | Enriched.        | 0.000000 |
| L                                                  | Depleted.        | 0.000000 | L                                                                         | Depleted.        | 0.000001 | L                                                             | Depleted.        | 0.000000 |
| M                                                  | Not significant. | 0.645290 | M                                                                         | Not significant. | 0.785506 | M                                                             | Not significant. | 0.489690 |
| N                                                  | Enriched.        | 0.000057 | N                                                                         | Enriched.        | 0.000289 | N                                                             | Enriched.        | 0.000146 |
| P                                                  | Not significant. | 0.099818 | P                                                                         | Depleted.        | 0.000000 | P                                                             | Not significant. | 0.040930 |
| Q                                                  | Not significant. | 0.750761 | Q                                                                         | Depleted.        | 0.000000 | Q                                                             | Not significant. | 0.691177 |
| R                                                  | Enriched.        | 0.000000 | R                                                                         | Enriched.        | 0.000000 | R                                                             | Enriched.        | 0.000000 |
| S                                                  | Not significant. | 0.798094 | S                                                                         | Not significant. | 0.002792 | S                                                             | Not significant. | 0.870296 |
| T                                                  | Depleted.        | 0.000018 | T                                                                         | Not significant. | 0.003142 | T                                                             | Depleted.        | 0.000000 |
| V                                                  | Not significant. | 0.005469 | V                                                                         | Enriched.        | 0.000477 | V                                                             | Depleted.        | 0.000000 |
| W                                                  | Depleted.        | 0.000000 | W                                                                         | Not significant. | 0.183428 | W                                                             | Depleted.        | 0.000000 |
| Y                                                  | Not significant. | 0.462950 | Y                                                                         | Not significant. | 0.006848 | Y                                                             | Not significant. | 0.158704 |
