# Supplementary figures and images for: The Amino Acid Composition of Quadruplex Binding Proteins Reveals a Shared Motif and Predicts New Potential Quadruplex Interactors
Source: MDPI journal article supplement (doi:10.3390/molecules23092341), 2018-09-13

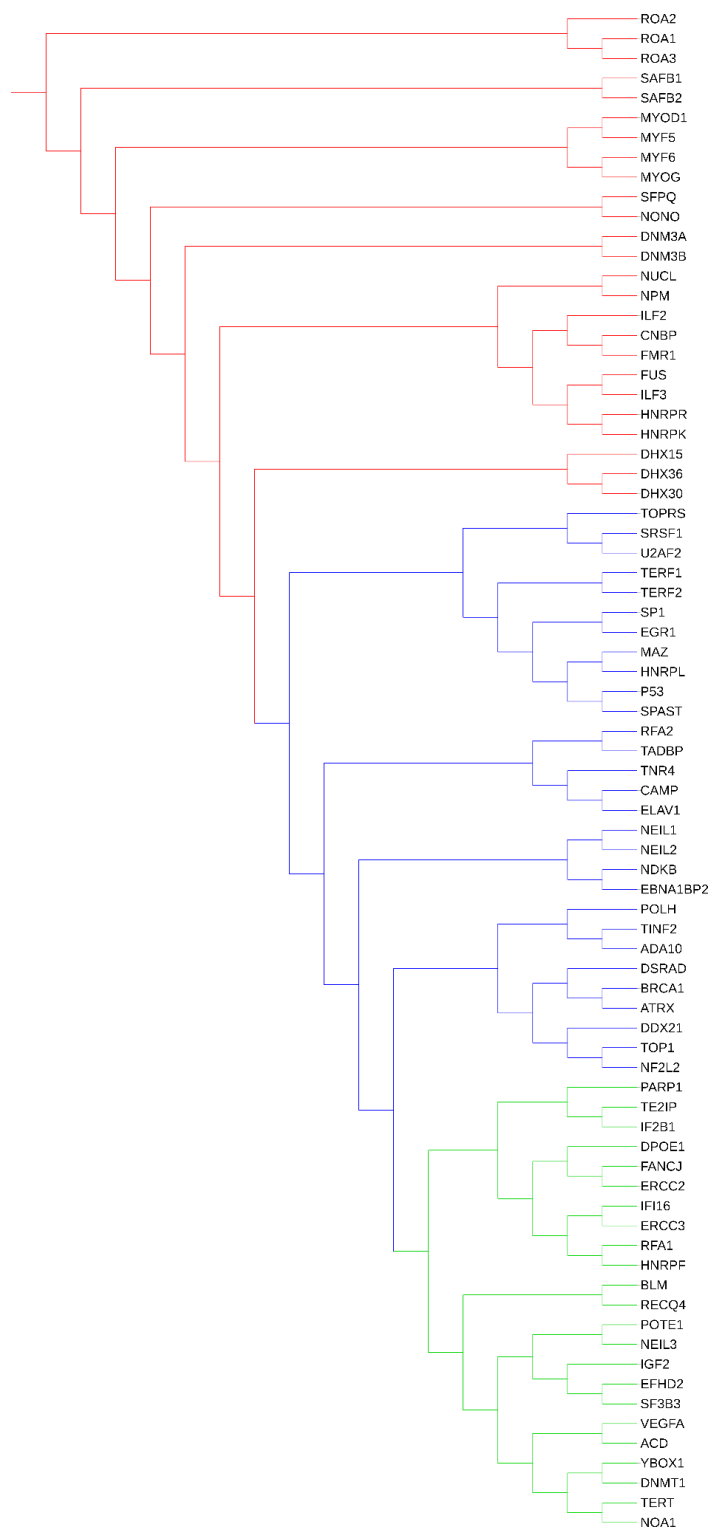

**Supplementary material 8: CLAP tree of 77 quadruplex binding proteins**

Supplement: s1 [file s1]
